# Supplementary material for: Extracting Reliable Twitter Data for Flood Risk Communication using Manual Assessment and Google Vision API from Text and Images
Source: Preprints.org preprint supplement (doi:10.20944/preprints202008.0487.v1), 2020-08-22
Supplement: Supplementary file 1 [file supplementary]

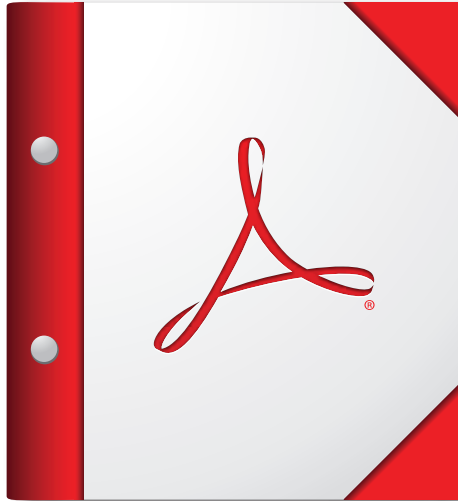

**For the best experience, open this PDF portfolio in  
Acrobat X or Adobe Reader X, or later.**

**Get Adobe Reader Now!**
