# Supplementary material for: Extracting Reliable Twitter Data for Flood Risk Communication using Manual Assessment and Google Vision API from Text and Images
Source: Preprints.org preprint supplement (doi:10.20944/preprints202008.0487.v1), 2020-08-22
Supplement: Supplementary file 2 [file supplementary]

Archive with 4 entries (4 files):
- Flood_risk_communicaiton_data mining_NIMHD_author agreement.pdf
- reviwer 1_ comments_addressed.docx
- reviwer 2 comments_addressed.docx
- reviwer 3 comments_addressed.docx
